1 **Title page**

2 **Running Head**

3 Response of sow to *ginseng polysacchari*

4

5 The effect of dietary ginseng polysaccharide supplementation on the immune  
6 responses involved in porcine milk-derived esRNAs

7

8 Jiajie Sun, Liyuan Yao, Ting Chen, Qianyun Xi, Yongliang Zhang\*

9

10 College of Animal Science, Guangdong Provincial Key Lab of Agro-Animal  
11 Genomics and Molecular Breeding, National Engineering Research Center for  
12 Breeding Swine Industry, South China Agricultural University, Guangzhou,  
13 Guangdong 510642, China.

14

15 \*Corresponding author:

16 Prof. Dr. Yongliang Zhang

17 Phone: +86-135 2780 3004

18 Fax: +86-020-8528 5931

19 E-mail: zhangyl@scau.edu.cn

20

21

22 **Abstract:** Ginseng and its polysaccharides (GPS) have been well known as an  
23 immune modulator. This study was conducted to investigate the effects of dietary  
24 supplemental GPS on the immune responses involved in sow's milk-derived exosomal  
25 shuttle RNAs (esRNAs) using RNA-Seq and miRNA-Seq. Of the 213 identified  
26 miRNA types, a total of 26 conserved miRNAs were differently expressed in response  
27 to GPS supplementation, including 10 up-regulated and 16 down-regulated miRNAs  
28 in GPS feeding group. In addition, exosomal transcriptome analysis identified 14,696  
29 protein-coding genes in sow's milk exosomes, and 283 genes with 204 and 79  
30 candidates showing up and down-regulation were significantly responded to GPS  
31 supplementation. Integrated analysis of each differently expressed miRNA with  
32 significantly expressed genes further revealed the presence of 51 highly conserved  
33 miRNA-gene interactions that were annotated to be related to immunoregulatory  
34 functions. This work provided an important advance in the functional identification of  
35 dietary GPS supplementation and more fundamental information about how GPS  
36 promoted the immune response and healthy growth of the infant from mothers at  
37 molecular levels.

38

39 **Keywords:** esRNAs; exosome; ginseng polysaccharide; milk; sow

40

## 41 **Introduction**

42 Ginseng (*Panax ginseng* C.A. Meyer), one of the most well-known oriental  
43 medicine for several thousand years, has been widely used with mysterious powers as  
44 a tonic, prophylactic and restorative agent, etc. (Sun 2011) The polysaccharide  
45 extracted from the medicinal ginseng root (mostly), stems and leaves was  
46 demonstrated to have many functions, including inhibition of tumors (Li *et al.* 2014),  
47 suppression of bacterial (Fukuyama *et al.* 2012) and viral (Kim *et al.* 2011) activity,  
48 anti-peroxidatic reactions (Luo *et al.* 2008), and innate (Shin *et al.* 2002) or acquired  
49 (Sumiyoshi *et al.* 2011) immune modulation. In recent years, there has been growing  
50 interests in the use of polysaccharides as new, alternative immunologic additives for  
51 agricultural animals. Chen *et al.* (Chen *et al.* 2009) indicated an increase in cellular  
52 and humoral immunities by modulating the production of antibodies, complements  
53 and cytokines in the *Achyranthes bidentata* polysaccharide supplemented weaned  
54 piglets, conferring an important protective role in the non-specific defense against  
55 infections. In our previous study, dietary GPS significantly increased immune enzyme  
56 activity and modified expression of immune genes in shrimp (Liu *et al.* 2011).  
57 However, to date the effects of dietary polysaccharide supplementation on lactating  
58 sows was deficient.

59 In general, breast milk supplied the chief nutrient source during the natural  
60 suckling period of the neonates, and milk liquid with immune-related composition  
61 also provided immunity to the infant and affected the maturation of the infant's  
62 immune system (Admyre *et al.* 2007). Previous research has reported that exosomes  
63 were identified to present in the breast milk (Zhou *et al.* 2012), which were small  
64 membrane vesicles of endocytic origin that were released from the producing cell into  
65 the extracellular environment (Théry *et al.* 2002). And exosomes have been proposed  
66 to signal by binding to the recipient cell surface receptors or by internalisation with  
67 the cell membrane (Valadi *et al.* 2007), potentially donating substantial amounts of  
68 exosomal RNAs such as mRNAs, microRNAs (miRNAs), and other non-coding  
69 RNAs (ncRNAs) to other cells and subsequently affecting the protein production of a  
70 recipient cell (Sato-Kuwabara *et al.* 2005). In addition, previous research has revealed

71 the ability of human breast milk exosomes to potentially influence the immune system  
72 of the infant ([Admyre et al. 2007](#)).

73 Overall, we therefore hypothesized that dietary supplementation with GPS  
74 influenced the composition of sow milk, especially for immune-related esRNAs, and  
75 further enhanced the immune responses in suckling piglets. This hypothesis was  
76 performed by miRNA and RNA sequencing to analyze the porcine breast milk  
77 exosomes in response to GPS supplementation.

78

## 79 **Materials and Methods**

### 80 **Animals and feeding**

81 The GPS were extracted from the roots of *P. ginseng* according to the protocols  
82 described in our previous research ([Liu et al. 2011](#)). A total of 20 Large White sows at  
83 90 days of gestation were acquired from WENS breeding pig farm (Qingyuan,  
84 Guangdong, China) and allocated into two dietary treatment groups on the basis of  
85 age, body weight and parities. Control group (Con) was fed the basal diet, and the diet  
86 of treatment group was added with 400 mg/kg GPS until 14th day after delivery.  
87 Porcine milk samples were collected at day 1, 3, 7 and 14 after parturition, and kept at  
88 -80°C until use.

89

### 90 **Milk exosomes collection and sequencing analysis**

91 Preparation of exosomes from porcine milk was operated as our previous  
92 descriptions ([Chen et al. 2014](#)). Total RNAs were extracted from pelleted exosomes  
93 using TRIzol<sup>®</sup> Reagent ([Life Technologies, Carlsbad, CA, USA](#)) by the  
94 manufacturer's protocol, and the quantity and purity were analysis using Bioanalyzer  
95 2100 and RNA 6000 Nano Labchip Kit ([Agilent, CA, USA](#)) with RNA Integrity  
96 Number (RIN) value  $\geq 7.0$ . Prior to constructing Illumina-indexed libraries, the total  
97 RNAs from four different time points were pooled equally in each treatment group.  
98 Subsequently, indexed miRNAome and transcriptome sequencing libraries were  
99 constructed with Illumina TruSeq Small RNA Library Preparation Kits and TruSeq

100 RNA Library Preparation Kits ([Illumina, San Diego, CA](#)) respectively, which  
101 included size selection of the final library amplicons. Finally, the libraries were  
102 sequenced using Illumina HiSeq<sup>TM</sup> 2000, and the raw reads were demultiplexed and  
103 the indexed adapter sequences were trimmed using the CASAVA v1.8.2 software.

104

#### 105 **miRNA analysis**

106 Firstly, the raw reads of control and GPS supplemented group were processed  
107 with ACGT101-miR program ([LC Sciences, Houston, Texas, USA](#)) to trim 3' adapter  
108 and discard reads with poly N and reads shorter than 17 bp. Then, using BLAST  
109 search all clean reads were aligned to porcine miRNA mature and precursor sequences  
110 published in miRBase v21.0 (<http://www.mirbase.org/>) to identified conserved  
111 miRNAs. The read count of each identified miRNA was firstly normalized to reads  
112 per million, and the R v3.0.2 Bioconductor package EDGER v2.4.6 ([Robinson \*et al.\* 2010](#))  
113 was applied to identify differentially expressed (DE) miRNAs with p value <  
114 0.05 and fold change  $\geq 2$  between different groups.

115

#### 116 **Align the RNA-seq reads to genome and assemble expressed transcripts**

117 Raw reads of fastq format were firstly processed by removing the low quality  
118 reads and the reads that contain adapter or ploy-N. Then, the clean reads from each  
119 library were aligned to the Sscrofa10.2 reference genome  
120 (<http://hgdownload.soe.ucsc.edu/goldenPath/susScr3/bigZips/susScr3.fa.gz>)  
121 downloaded from the the University of California Santa Cruz (UCSC) website with  
122 TopHat v2.0.12 ([Trapnell \*et al.\* 2009](#)). The mapped reads of each group were  
123 assembled by Cufflinks 2.2.1 ([Trapnell \*et al.\* 2012](#)), and using Cuffmerge two  
124 assemblies were merged to create a single transcriptome annotation with porcine  
125 Ensembl's genes generated by UCSC table browser for subsequent protein-coding  
126 gene analysis. The gene expression level was analyzed by using RPKM method  
127 (Reads per kilobase transcriptome per million mapped reads) ([Mortazavi \*et al.\* 2008](#)),  
128 and only genes with False Discovery Rate (FDR) value < 0.05 that calculated by  
129 Cuffdiff program and  $|\log_2 \text{fold change}| \geq 1$  were considered as differently expressed

130 candidates.

131

### 132 **miRNA target prediction and network construction**

133 Putative targets of DE miRNAs were evaluated using miRanda (Betel *et al.*  
134 2010), and only alignments with energies  $\leq -20.0$  kcal/mol and no mismatch in the  
135 seed region (positions 2–8 in the 5'end) were used for further analysis. The  
136 construction of interaction networks included three steps: (□) DE mRNAs and DE  
137 protein-coding genes were first retained; (□) then mRNA-miRNA negative  
138 interactions were predicted by miRanda analysis; (□) potential interactions of  
139 targets-miRNA were established and visualized using Cytoscape V3.4  
140 (<http://cytoscape.org/>).

141

## 142 **Results and Discussion**

### 143 **Sequence analysis of milk exosomal miRNAs**

144 Solexa sequencing provided a total of 13,256,489 and 11,349,485 raw reads of  
145 51 nt from the Con and GPS libraries, respectively. After removing 3' adapter null or  
146 5' adapter contaminants, low quality reads, and reads contained poly N or smaller than  
147 17 nt, a total of 12,256,073 and 10,654,756 clean reads of 17–31 nt were obtained  
148 (Table 1). Subsequently, clean reads were mapped to porcine miRNA mature and  
149 precursor sequences published in miRBase 21.0 by BLAST search to identify known  
150 miRNAs, and length variation at both 3' and 5' ends and one mismatch inside of the  
151 sequences were allowed in the alignment. In total, we identified 213 unique miRNA  
152 types aligned to 181 independent pre-miRNA loci with read number more than 10,  
153 and 188 known miRNAs were expressed in both Con and GPS groups (Table S1A).  
154 The 10 most highly expressed miRNAs in each group accounted for  $89.64\% \pm 3.07\%$   
155 of the total counts of all unique miRNAs, and four of these miRNAs  
156 (ssc-miR-148a-3p, ssc-miR-30a-5p, ssc-miR-21 and ssc-miR-26a) were found in  
157 common across two tested groups, indicating that the majority of miRNAs were  
158 expressed from very few loci that maybe play very important roles in milk. Recently,  
159 similar miRNAs were identified by sequencing of porcine (Chen *et al.* 2014), bovine

160 (Sun *et al.* 2015) and human (Chen *et al.* 2010) milk exosomes, and miR-148a-3p and  
161 miR-30a were also represented as the top 10 miRNAs. Of the identified miRNAs, the  
162 most abundant was miR-148a-3p, which represented  $56.02\% \pm 5.88\%$  reads across  
163 two libraries. The predominance of miR-148a was consistent with its well-established  
164 function as a nutritional biomarker corresponding to the protein content of various  
165 bovine-derived milk products (Chen *et al.* 2010). Interestingly, feeding studies that  
166 have shown exogenous plant (Zhang *et al.* 2012) or milk (Baier *et al.* 2014) miRNAs  
167 can be found in the sera and tissues and influence regulation of target genes in  
168 recipient animals, suggesting that the enrichment of specific miRNAs derived from  
169 milk in our study may also influence the growth and development of neonates.  
170 Specifically, miR-148a influenced dendritic cell activation and maturation by  
171 down-regulating calcium/calmodulin-dependent protein kinase IIa (CaMKIIa)  
172 expression, and finally associated with anti-inflammatory responses (Turner *et al.*  
173 2011). MiR-30a attenuated immunosuppressive functions of IL-1 $\beta$ -elicited  
174 mesenchymal stem cells via targeting transforming growth factor- $\beta$ -activated kinase 1  
175 binding protein 3 (TAB3) (Hu *et al.* 2015). Also widely studied for possible  
176 involvement in the pathogenesis of multiple autoimmune and chronic inflammatory  
177 disorders, miR-21 expression was specifically elevated in Th17 cells, and T  
178 cell-intrinsic expression of miR-21 was important for effective Th17 differentiation  
179 (Murugaiyan *et al.* 2015). In addition, cellular miR-26a suppressed replication of  
180 porcine reproductive and respiratory syndrome virus by activating innate antiviral  
181 immunity (Jia *et al.* 2015). Even though there were compelling evidences that the  
182 most prevalent miRNAs in our study could potentially exert an influence on immune  
183 response, the specific functional roles of these miRNAs need further detailed  
184 investigations to obtain a thorough understanding of the specific targets and  
185 mechanistic effects on consumption of miRNA-loaded porcine milk exosomes by a  
186 recipient animal.

187

188

189 **Expression analysis on porcine milk exosomal transcriptome**

190 The single-end RNA reads generated from sequencing of the exosomal libraries  
191 were trimmed to remove adapter sequences and then filtered. After filtering  
192 procedures, a total of 77,106,888 and 82,953,484 high-quality reads were considered  
193 for further analysis, resulted in ~6.46 and ~6.95 gigabases (Gb) from Con and GPS  
194 libraries, respectively. We aligned all these high-quality reads onto the porcine  
195 *Sscrofa10.2* reference genome, and found that over  $63.59\% \pm 0.25\%$  of the reads were  
196 mapped to the genome, including  $58.31\% \pm 0.23\%$  of the mapped reads that were  
197 aligned uniquely in each library (Table S2A). Transcripts assembled with mapped  
198 reads using cufflinks revealed a total of 14,696 protein-coding genes across the two  
199 libraries, and Con specific units accounted for 95.30% of all identified genes, as well  
200 as 94.55% existed in the GPS library (Table S2B), consistent with previous study  
201 indicating that 19,320 mRNA transcripts were present in bovine milk exosomes  
202 (Izumi *et al.* 2015). In addition, the top 100 highly expressed genes in sequencing  
203 libraries accounted for  $72.91\% \pm 0.96\%$  of the total expression levels calculated by  
204 RPKM value, and a total of 98 genes were common to both groups. We then  
205 performed Gene Ontology (GO) enrichment analysis of these highly expressed genes  
206 using the DAVID bioinformatics resource, which employs a Fisher's Exact Test with  
207 Benjamini–Hochberg correction. A total of 82 enriched GO categories were derived  
208 using a P-value cut-off of  $P < 0.05$ , including 56 Biological Process (BP), 19 Cell  
209 Component (CC) and 7 Molecular Function (MF) categories (Table S2C), respectively.  
210 These categories were mainly focused on translational elongation, ribosome  
211 biogenesis, rRNA processing and rRNA metabolic process, clearly indicating that the  
212 exosomal RNAs were enriched in rRNA-family species (Jenjaroenpun *et al.* 2013).  
213 Jenjaroenpun *et al.* found that cellular exosomes contained various classes of RNA  
214 moleculars with the major class represented by fragmented ribosomal RNA (rRNA),  
215 in particular 28S and 18S subunits. The observation in our and previous studies  
216 suggested that the majority of exosomal rRNAs were fragmented, and these results  
217 may explain why the 28S and 18S rRNA cannot be detected in exosomal total RNAs  
218 (Gu *et al.* 2012).

219



220 **miRNA and their target expression in response to GPS supplementation**

221 After normalization, miRNAs that changed more than 2-fold and p value less  
222 than 0.05 were considered to be differently up or down regulated in response to GPS  
223 supplementation. In total, there were 10 miRNAs up-regulated in the milk exosomes  
224 of GPS group compared with control, as well as 16 down-regulated miRNAs ([Table](#)  
225 [S1B](#)). To identify the potential function of these DE miRNAs, target prediction was  
226 performed using miRanda software. Prediction analyses yielded a total of 3,525  
227 unique genes potentially regulated by DE miRNAs. This resulted in 4,902  
228 miRNA-target interactions; 3,271 of these were targeted by up-regulated miRNAs,  
229 and 1,631 were targeted by down-regulated miRNAs ([Table S1C](#)). The KEGG  
230 pathway analysis of the predicted targets by DAVID Bioinformatics Resources  
231 revealed 22 unique KEGG terms with P value < 0.05, which had been previously  
232 implicated in immune and disease. These pathways included the top 5 statistical  
233 enrichment, namely Pancreatic cancer, MAPK signaling pathway, B cell receptor  
234 signaling pathway, T cell receptor signaling pathway and Fc gamma R-mediated  
235 phagocytosis ([Table S1D](#)), suggesting the functions of GPS in immune enhancement  
236 and regulation.

237 Previous reports have documented the functional connection between RNA  
238 editing and miRNA-mediated post-transcriptional gene silencing ([Bartel et al. 2009](#)).  
239 To characterize the potential effects of RNA editing on miRNAs in porcine milk  
240 exosomes, we first profiled porcine milk exosomal transcriptome between Con and  
241 GPS groups. Of 14,696 identified protein-coding genes, a total of 283 exosomal genes  
242 were further considered to be differently expressed in response to GPS  
243 supplementation based on  $|\log_2 \text{fold change}| \geq 1$ ,  $\text{FDR} < 0.05$  and  $\text{gene coverage} \geq 60\%$ ,  
244 including 204 up-regulated and 79 down-regulated genes in GPS groups ([Table S2D](#)).  
245 Next, we aimed to compute all possible interactions of each DE miRNA with  
246 significantly expressed genes. Generally, an up-regulation of a target gene indicates a  
247 decrease activity of the corresponding miRNA; therefore, a miRNA-mRNA  
248 interaction pair means anti-regulation of a miRNA and a corresponding gene. In final,  
249 miRanda analysis revealed the presence of 51 highly conserved miRNA-mRNA

250 interactions. Of these negative interactions, a total of 9 down-regulated genes  
251 appeared to be targeted by 8 up-regulated miRNAs in GPS group, and 17 up-regulated  
252 genes was targeted by 12 down-regulated miRNAs (Figure 1). By applying a cut-off  
253 criterion of FDR value < 0.05, GO enrichment analysis of these target candidates  
254 revealed a few important terms those were significantly enriched in the functions of  
255 immunity, such as neutrophil chemotaxis (CCL3L1, FCER1G, TGFβ2), phagocytosis  
256 (FCER1G, BIN2), cell chemotaxis (CXCL2, BIN2) and chemokine-mediated  
257 signaling pathway (CCL3L1, CXCL2) (Table S2E). In details, CCL3L1 dramatically  
258 influenced cell-mediated immunity (Dolan *et al.* 2007) and was targeted by  
259 ssc-miR-19a in our paper. Phagocytosis-related molecule FCER1G played a role in  
260 uptake of antigens bound to immunoglobulin E (Landi *et al.* 2011), and cytokine  
261 TGFβ2 acted an integral role in regulating immune responses (Rautava *et al.* 2011),  
262 these implying the biological functions of their anti-corresponding miR-22-3p and  
263 miR-374b-5p in porcine milk exosomes. In addition, kidney-specific miR-192 (Liang  
264 *et al.* 2007) significantly involved in immune-related gene expression (Wu *et al.*  
265 2012), consistent with our results in negative regulation of BIN2, a membrane  
266 sculpting protein that influenced leucocyte podosomes, motility and phagocytosis  
267 (Sánchez-Barrena *et al.* 2012). And mast cell and macrophage chemokine CXCL2, a  
268 target gene of miR-30a-3p, controlled the early stage of neutrophil recruitment during  
269 tissue inflammation (De Filippo *et al.* 2013). Taken together, we found that the  
270 expression of several key miRNAs and genes in porcine milk-derived exosomes were  
271 induced or decreased under GPS supplementation in porcine basal diets, and these  
272 miRNA-mRNA interactions were reported to be significantly related to  
273 immunoregulatory functions. Meanwhile, previous research has showed that  
274 exosomal mRNAs or miRNAs, termed esRNAs, can be delivered to another cell and  
275 take effect on the new location (Valadi *et al.* 2007). Therefore, the findings suggested  
276 the functions of dietary GPS supplementation in enhancing the immune-related  
277 esRNAs expression in milk-derived exosomes, and these candidates may be further  
278 transferred to suckling piglets for immune system development and healthy growth.

279 In conclusion, we detected 26 miRNAs and 283 genes in porcine milk-derived

280 exosomes that showed differential expression in response to GPS supplementation in  
281 sow's basal diets. Integrated analysis and functional annotation revealed 51 highly  
282 conserved miRNA-mRNA interactions that were significantly related to  
283 immunoregulatory functions. This work provided an important advance in the  
284 functional identification of dietary GPS supplementation and more fundamental  
285 information about how GPS promoted the immune response and healthy growth of the  
286 infant at the molecular level.

287

### 288 **Acknowledgments**

289 This work was supported by grants from the Natural Science Foundation of  
290 Guangdong province (2016A030310449, 2016A030313413), the Key Project of  
291 Transgenic Animal (2014ZX0800948B), the National Basic Research Program of  
292 China (973 Program, 2013CB127304), and Natural Science Foundation of China  
293 program (31272529, 31472163). None of the authors declare any conflicts of  
294 interests.

295

### 296 **Conflict of Interests**

297 The authors have declared that no conflict of in-terest exists.

298

### 299 **Supporting information available**

300 Known miRNAs identified in both Con and GPS groups were showed in Table  
301 S1A; differently expressed miRNAs between Con and GPS groups in response to  
302 GPS supplementation were showed in Table S1B; miRNA target gene prediction were  
303 showed in Table S1C; KEGG analysis of the target genes of DE miRNAs were  
304 showed in Table S1D. Summary of RNA-seq dates were showed in Table S2A;  
305 Protein-coding genes identified in both Con and GPS groups were showed in Table  
306 S2B; Gene Ontology (GO) enrichment analysis of highly expressed genes were  
307 showed in Table S2C; Differently expressed genes between Con and GPS groups in  
308 response to GPS supplementation were showed in Table S2D; GO enrichment  
309 analysis of target candidates presented in miRNA-mRNA interaction network were

310 showed in Table S2E.

311

## 312 **References**

313 Admyre, C., S.M. Johansson, K.R. Qazi, J.J. Filén, R. Lahesmaa *et al.*, 2007

314 Exosomes with immune modulatory features are present in human breast milk.

315 *The Journal of immunology* 179(3): 1969-1978

316 Baier, S.R., C. Nguyen, F. Xie, J.R. Wood, J. Zemleni, 2014 MicroRNAs are

317 absorbed in biologically meaningful amounts from nutritionally relevant doses of

318 cow milk and affect gene expression in peripheral blood mononuclear cells,

319 HEK-293 kidney cell cultures, and mouse livers. *The Journal of nutrition*

320 144(10): 1495-1500

321 Bartel, D.P., 2009 MicroRNAs: target recognition and regulatory functions. *Cell*

322 136(2): 215-233

323 Betel, D., A. Koppal, P. Agius, C. Sander, C. Leslie, 2010 Comprehensive modeling

324 of microRNA targets predicts functional non-conserved and non-canonical sites.

325 *Genome biology* 11(8): R90

326 Chen, Q., Z. Liu, J.H. He, 2009 *Achyranthes bidentata* polysaccharide enhances

327 immune response in weaned piglets. *Immunopharmacology and*

328 *immunotoxicology* 31(2): 253-260

329 Chen, T., Q.Y. Xi, R.S. Ye, X. Cheng, Q.E. Qi, *et al.*, 2014 Exploration of microRNAs

330 in porcine milk exosomes. *BMC genomics* 15(1): 1

331 Chen, X., C. Gao, H. Li, L. Huang, Q. Sun, *et al.*, 2010 Identification and

332 characterization of microRNAs in raw milk during different periods of lactation,

333 commercial fluid, and powdered milk products. *Cell research* 20(10): 1128-1137

334 De Filippo, K., A. Dudeck, M. Hasenberg, E. Nye, N. van Rooijen, *et al.*, 2013 Mast

335 cell and macrophage chemokines CXCL1/CXCL2 control the early stage of

336 neutrophil recruitment during tissue inflammation. *Blood* 121(24): 4930-4937

337 Dolan, M.J., H. Kulkarni, J.F. Camargo, W. He, A. Smith, *et al.*, 2007 CCL3L1 and

338 CCR5 influence cell-mediated immunity and affect HIV-AIDS pathogenesis via

339 viral entry-independent mechanisms. *Nature immunology* 8(12): 1324-1336

- 340 Fukuyama, N., M. Shibuya, Y. Orihara, 2012 Antimicrobial polyacetylenes from  
341 Panax ginseng hairy root culture. Chemical and Pharmaceutical Bulletin 60(3):  
342 377-380
- 343 Gu, Y., M. Li, T. Wang, Y. Liang, Z. Zhong, *et al.*, 2012 Lactation-related microRNA  
344 expression profiles of porcine breast milk exosomes. PLoS One 7(8): e43691
- 345 Hu, E., L. Ding, H. Miao, F. Liu, D. Liu, *et al.*, 2015 MiR-30a attenuates  
346 immunosuppressive functions of IL-1 $\beta$ -elicited mesenchymal stem cells via  
347 targeting TAB3. FEBS letters 589: 3899-3907
- 348 Izumi, H., M. Tsuda, Y. Sato, N. Kosaka, 2015 Bovine milk exosomes contain  
349 microRNA and mRNA and are taken up by human macrophages. Journal of dairy  
350 science 98(5): 2920-2933
- 351 Jenjaroenpun, P., Y. Kremenska, V.M. Nair, M. Kremenskoy, B. Joseph, *et al.*, 2013  
352 Characterization of RNA in exosomes secreted by human breast cancer cell lines  
353 using next-generation sequencing. Peer J. 1: e201
- 354 Jia, X., Y. Bi, J. Li, Q. Xie, H. Yang, *et al.*, 2015 Cellular microRNA miR-26a  
355 suppresses replication of porcine reproductive and respiratory syndrome virus by  
356 activating innate antiviral immunity. Scientific reports 5
- 357 Kim, J.Y., H.J. Kim, 2011 Effect of Oral Administration of Korean Red Ginseng on  
358 Influenza A (H1N1) Virus Infection. Journal of Ginseng Research 35(1): 104-110
- 359 Landi, A., L.A. Babiuk, 2011 Dendritic cells matured by a prostaglandin  
360 E2-containing cocktail can produce high levels of IL-12p70 and are more mature  
361 and Th1-biased than dendritic cells treated with TNF- $\alpha$  or LPS. Immunobiology  
362 216(6): 649-662
- 363 Li, C., Z.N. Tian, J.P. Cai, K.X. Chen, B. Zhang, *et al.*, 2014 Panax ginseng  
364 polysaccharide induces apoptosis by targeting Twist/AKR1C2/NF-1 pathway in  
365 human gastric cancer. Carbohydrate polymers 102: 103-109
- 366 Liang, Y., D. Ridzon, L. Wong, C. Chen, 2007 Characterization of microRNA  
367 expression profiles in normal human tissues. BMC genomics 8(1): 1
- 368 Liu, X.L., Q.Y. Xi, L. Yang, H.Y. Li, Q.Y. Jiang, *et al.*, 2011 The effect of dietary

- 369       Panax ginseng polysaccharide extract on the immune responses in white shrimp,  
370       Litopenaeus vannamei. Fish & shellfish immunology 30(2): 495-500
- 371   Luo, D., B. Fang, 2008 Structural identification of ginseng polysaccharides and  
372       testing of their antioxidant activities. Carbohydrate Polymers 72(3): 376-381
- 373   Mortazavi, A., B.A. Williams, K. McCue, L. Schaeffer, B. Wold, 2008 Mapping and  
374       quantifying mammalian transcriptomes by RNA-Seq. Nature methods 5(7):  
375       621-628
- 376   Murugaiyan, G., L.P. Garo, H.L. Weiner, 2015 MicroRNA-21, T helper lineage and  
377       autoimmunity. Oncotarget 6(12): 9644
- 378   Rautava, S., L. Lu, N.N. Nanthakumar, A. Dubert-Ferrandon, W.A. Walker, 2012  
379       TGF- $\beta$ 2 induces maturation of immature human intestinal epithelial cells and  
380       inhibits inflammatory cytokine responses induced via the NF- $\kappa$ B pathway.  
381       Journal of pediatric gastroenterology and nutrition 54(5): 630
- 382   Robinson, M.D., D.J. McCarthy, G.K. Smyth, 2010 edgeR: a Bioconductor package  
383       for differential expression analysis of digital gene expression data.  
384       Bioinformatics 26(1): 139-140
- 385   Sánchez-Barrena, M.J., Y. Vallis, M.R. Clatworthy, G.J. Doherty, D.B. Veprintsev, *et*  
386       *al.*, 2012. Bin2 is a membrane sculpting N-BAR protein that influences leucocyte  
387       podosomes, motility and phagocytosis. PloS one 7(12): e52401
- 388   Sato-Kuwabara, Y., S.A. Melo, F.A. Soares, G.A. Calin, 2005 The fusion of two  
389       worlds: Non-coding RNAs and extracellular vesicles-diagnostic and therapeutic  
390       implications (Review). International journal of oncology 46(1): 17-27
- 391   Shin, J.Y., J.Y. Song, Y.S. Yun, H.O. Yang, D.K. Rhee, *et al.*, 2002  
392       Immunostimulating effects of acidic polysaccharides extract of Panax ginseng on  
393       macrophage function. Immunopharmacology and immunotoxicology 24(3):  
394       469-482
- 395   Sumiyoshi, M., M. Sakanaka, Y. Kimura, 2011 Effects of Red Ginseng extract on  
396       allergic reactions to food in Balb/c mice. Journal of ethnopharmacology 132(1):  
397       206-212
- 398   Sun, J., K. Aswath, S.G. Schroeder, J.D. Lippolis, T.A. Reinhardt, *et al.*, 2015

- 399        MicroRNA expression profiles of bovine milk exosomes in response to  
400        *Staphylococcus aureus* infection. *BMC genomics* 16(1): 806
- 401    Sun, Y., 2011 Structure and biological activities of the polysaccharides from the  
402        leaves, roots and fruits of *Panax ginseng* CA Meyer: An overview. *Carbohydrate*  
403        *Polymers* 85(3): 490-499
- 404    Théry, C., L. Zitvogel, S. Amigorena, 2002 Exosomes: composition, biogenesis and  
405        function. *Nature Reviews Immunology* (8): 9-579
- 406    Trapnell, C., L. Pachter, S.L. Salzberg, 2009 TopHat: discovering splice junctions  
407        with RNA-Seq. *Bioinformatics* 25(9): 1105-1111
- 408    Trapnell, C., A. Roberts, L. Goff, G. Pertea, D. Kim, *et al.*, 2012 Differential gene and  
409        transcript expression analysis of RNA-seq experiments with TopHat and  
410        Cufflinks. *Nature protocols* 7(3): 562-578
- 411    Turner, M.L., F.M. Schnorfeil, T. Brocker, 2011 MicroRNAs regulate dendritic cell  
412        differentiation and function. *The Journal of Immunology* 187(8): 3911-3917
- 413    Valadi, H., K. Ekström, A. Bossios, M. Sjöstrand, J.J. Lee, *et al.*, 2007  
414        Exosome-mediated transfer of mRNAs and microRNAs is a novel mechanism of  
415        genetic exchange between cells. *Nature cell biology* 9(6): 654-659
- 416    Wu, T.H., C.Y. Pan, M.C. Lin, J.C. Hsieh, C.F. Hui, *et al.*, 2012 In vivo screening of  
417        zebrafish microRNA responses to bacterial infection and their possible roles in  
418        regulating immune response genes after lipopolysaccharide stimulation. *Fish*  
419        *physiology and biochemistry* 38(5): 1299-1310
- 420    Zhang, L., D. Hou, X. Chen, D. Li, L. Zhu, *et al.*, 2012 Exogenous plant MIR168a  
421        specifically targets mammalian LDLRAP1: evidence of cross-kingdom  
422        regulation by microRNA. *Cell research* 22(1): 107-126
- 423    Zhou, Q., M. Li, X. Wang, Q. Li, T. Wang, *et al.*, 2012 Immune-related microRNAs  
424        are abundant in breast milk exosomes. *Int J Biol Sci.* 8(1): 118-123
- 425

426 **FIGURE CAPTIONS**

427

428 **Figure 1.** miRNA-mRNA correlation networks

429 Note: Circular nodes represented targets and triangular nodes represented miRNAs.

430 Red nodes represented an up-regulation and green represented a down-regulation

431 relative to match in GPS group. The size of each node represented for average

432 expressed level of each gene between two groups, and the significant levels between

433 different groups were associated with the color of node deepening.

434

435

436



437

438

439

Table 1 Summary of small RNA sequencing data

| Type                     | Con      |            | GPS      |            |
|--------------------------|----------|------------|----------|------------|
|                          | Count    | Percent(%) | Count    | Percent(%) |
| Total reads              | 13256489 | 100%       | 11349485 | 100%       |
| 3' adapter NULL          | 193785   | 1.46%      | 39610    | 0.35%      |
| Insert NULL              | 147791   | 1.11%      | 106849   | 0.94%      |
| 5' adapter contaminants  | 14380    | 0.11%      | 4129     | 0.04%      |
| Removed inferior quality | 95210    | 0.72%      | 61994    | 0.55%      |
| Smaller than 17 nt       | 549207   | 4.14%      | 482024   | 4.25%      |
| Poly-A/T/C/G/N           | 43       | 0.00%      | 123      | 0.00%      |
| Clean Reads              | 12256073 | 92.45%     | 10654756 | 93.88%     |

440

441

442 Figure 1

443

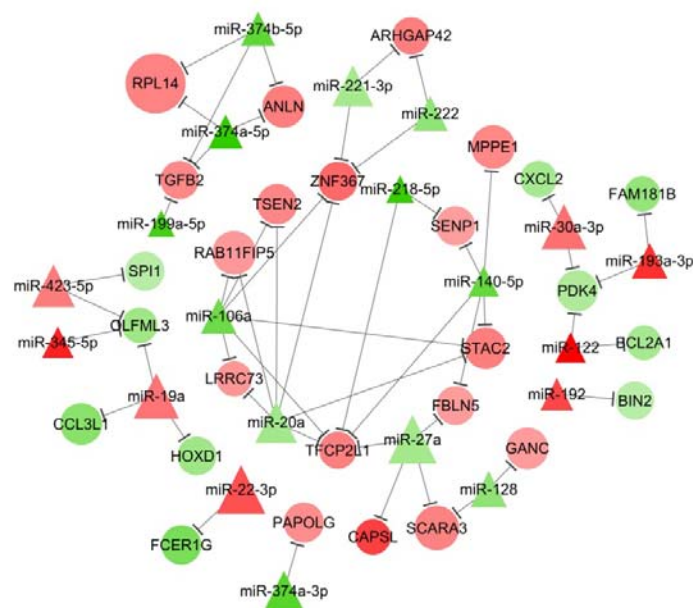

444

445
